# Supplementary material for: Climatically controlled reproduction drives interannual growth variability in a temperate tree species
Source: PubMed Central journal article supplement (PMC6446945; doi:10.1111/ele.13158), 2018-09-19

Appendix S1

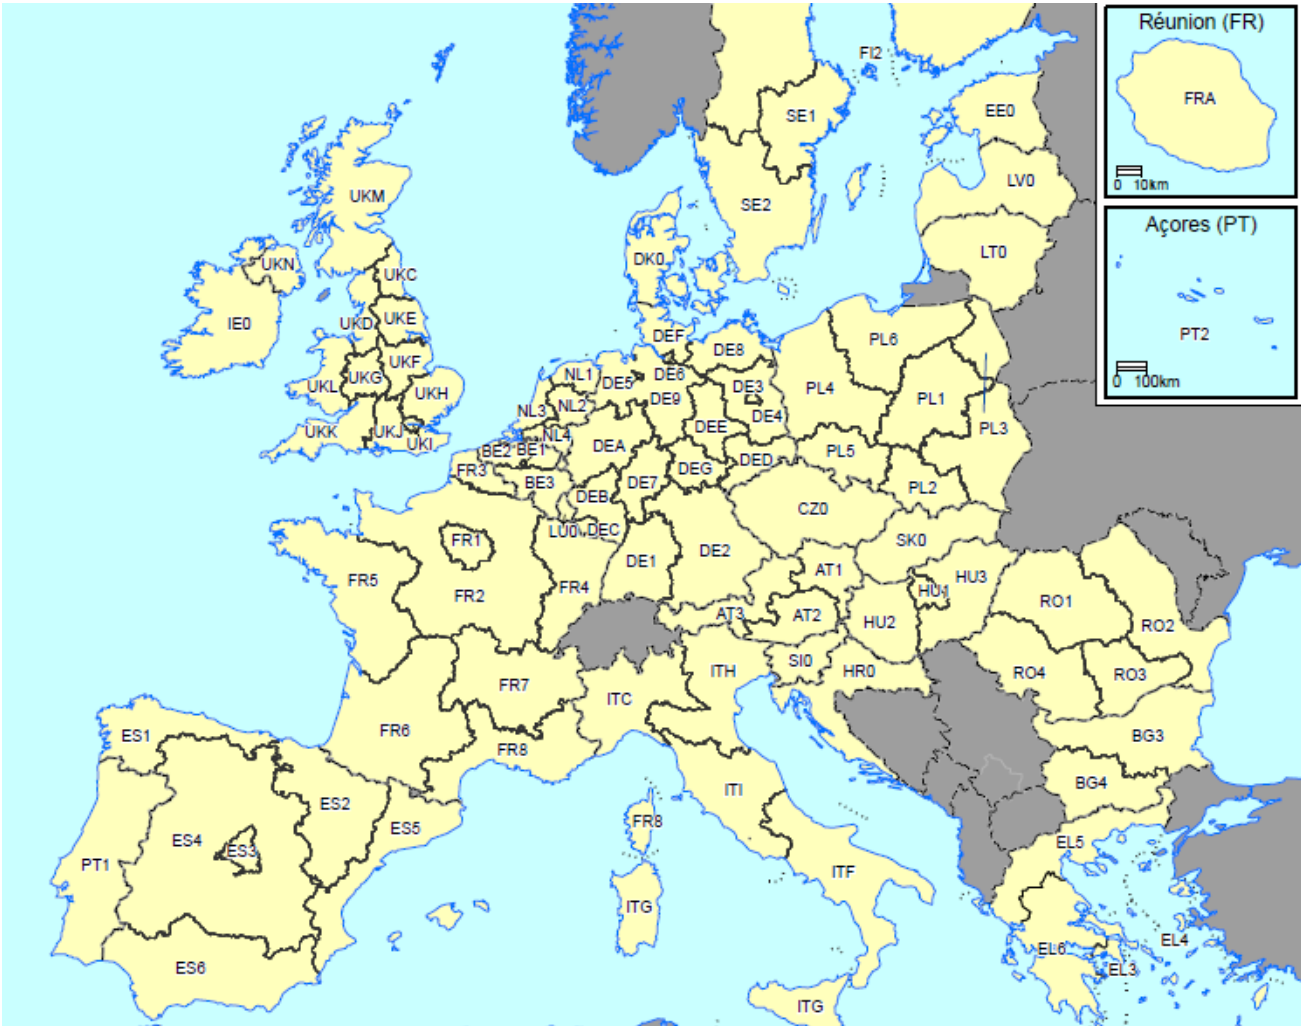

© EuroGeographics Association for the administrative boundaries. Cartography: Eurostat - GISCO, 2014

Map of European NUTS-1 regions (Nomenclature of Territorial Units for Statistics)

---

## Appendix S2

---

| NUTS-1 | n     | rho   |
|--------|-------|-------|
| AT2    | 5084  | 0.281 |
| AT3    | 10857 | 0.193 |
| DE1    | 314   | 0.692 |
| DE2    | 1656  | 0.435 |
| DE7    | 98    | 0.987 |
| DE8    | -     | NA    |
| DEA    | -     | NA    |
| DEB    | -     | NA    |
| PL4    | 670   | 0.818 |
| PL6    | 225   | 0.598 |
| SE2    | 159   | 0.950 |
| UKJ    | 371   | 0.628 |

Intra-NUTS correlation of masting series for regions used in model development and fitting and model validation, representing synchrony of independent masting records from each region. Mean spearman rank correlation of all pairs of observations from the same region with  $\geq 7$  years of overlap, with Hotelling correction for  $n < 30$  (see Vacchiano *et al.* 2017), for the period 1901-2016. No overlapping records exist for DE8, DEA and DEB.

## Appendix S3

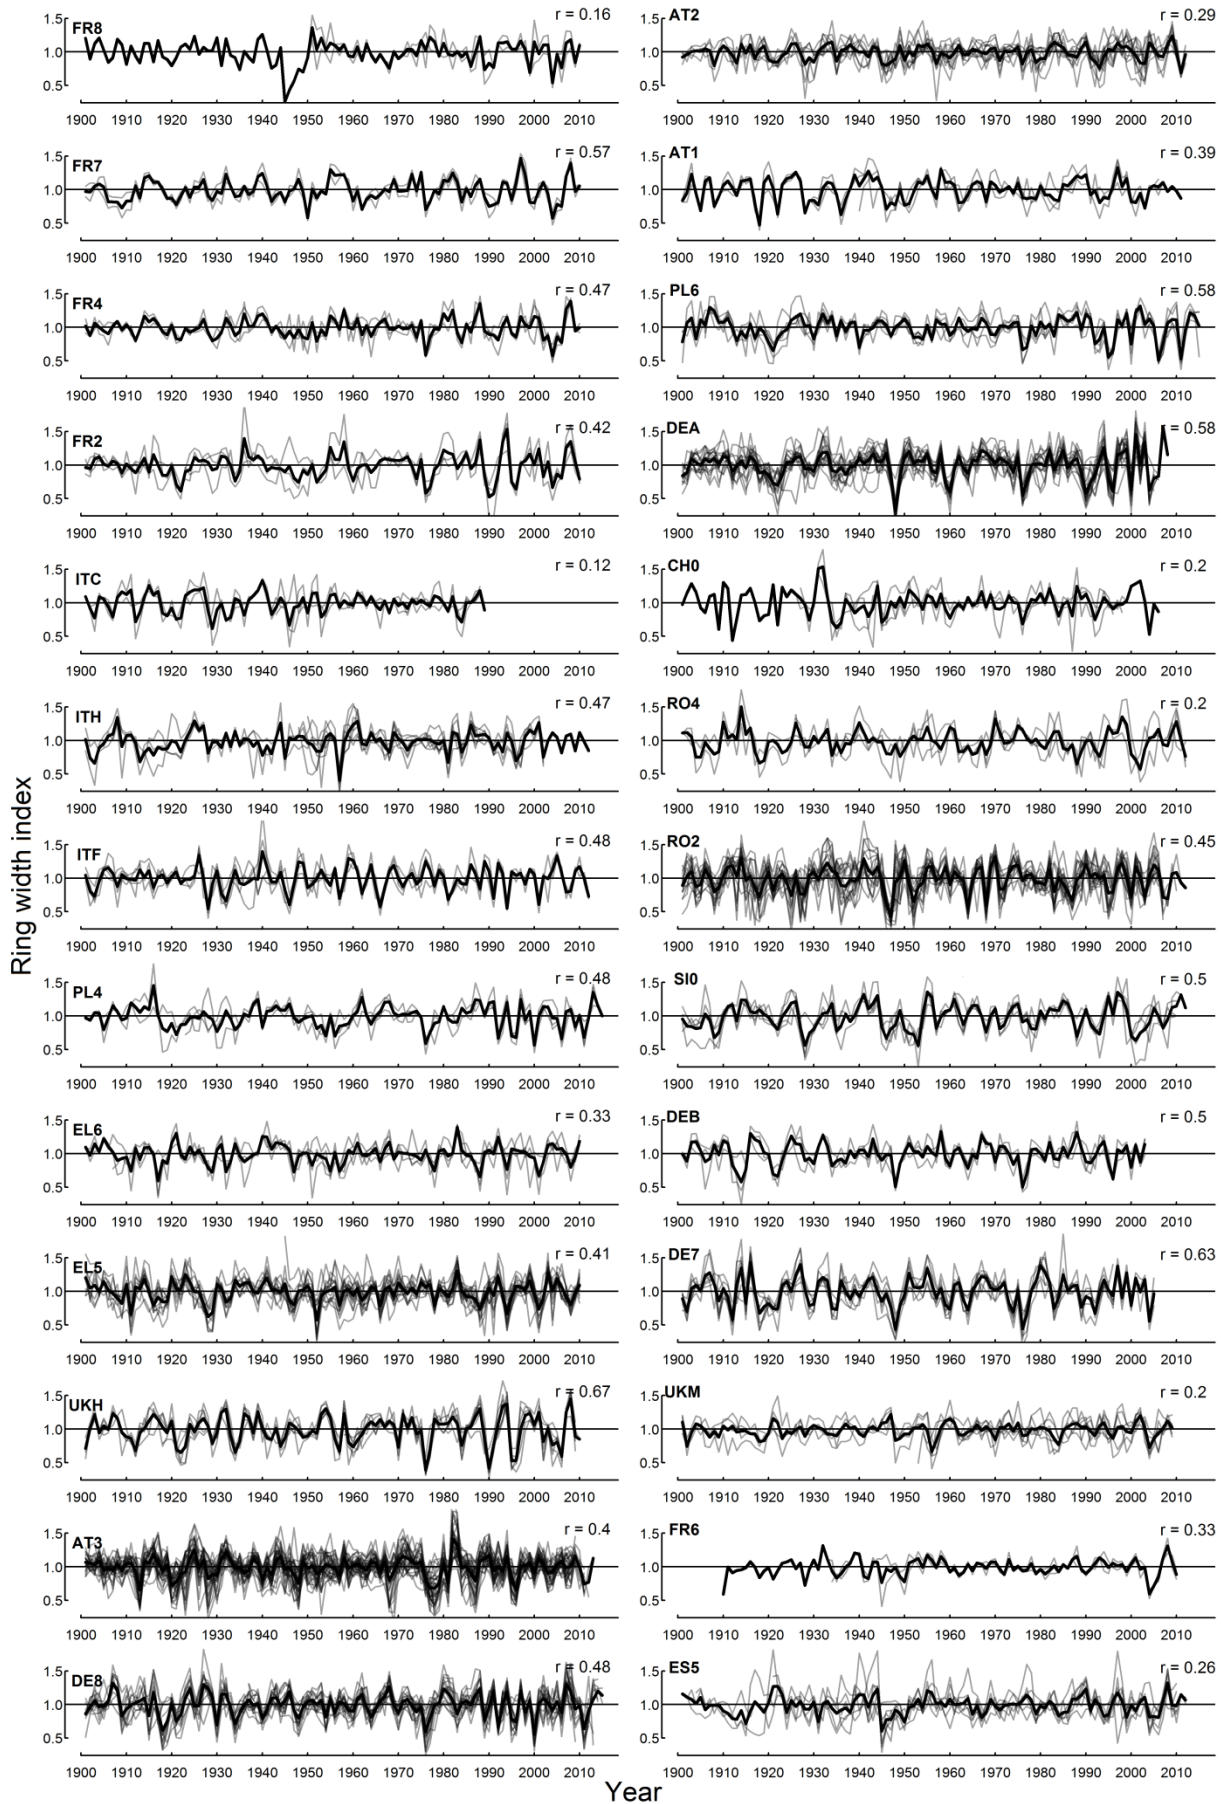

Individual site and region RWI chronologies for all regions in EBTRN with  $\geq 3$  individual sites, and the mean intra-site correlation

Number of contributing chronologies for each NUTS region

| NUTS region | Number of sites | NUTS region | Number of sites |
|-------------|-----------------|-------------|-----------------|
| FR8         | 3               | AT2         | 10              |
| FR7         | 3               | AT1         | 3               |
| FR4         | 3               | PL6         | 5               |
| FR2         | 3               | DEA         | 16              |
| ITC         | 3               | CH0         | 3               |
| ITH         | 7               | RO4         | 3               |
| ITF         | 6               | RO2         | 17              |
| PL4         | 3               | SI0         | 4               |
| EL6         | 4               | DEB         | 3               |
| EL5         | 17              | DE7         | 7               |
| UKH         | 7               | UKM         | 6               |
| AT3         | 33              | FR6         | 3               |
| DE8         | 15              | ES5         | 7               |

---

## Appendix S4

---

### Justification of the original theoretical model. See also Figure 1.

In our model, growth is influenced directly by climate conditions in the growing season (temperature and precipitation), which are known to influence physiological processes including leaf phenology, photosynthesis, and xylogenesis processes (e.g. Breda et al. 2006; Leuschner et al. 2001; Muller et al. 2011). Numerous studies have reported lagged correlations between tree-ring growth and previous summer climate conditions (Babst et al. 2013; Hackett-Pain et al. 2016; Piovesan et al. 2005), and so the model also includes links to represent these lagged effects. Growth is also influenced by prior-year growth, as shown by the typically high first-order autocorrelation present in tree-ring widths. This biological ‘memory’ may reflect the importance of stored carbohydrates on current increment, especially at the start of the growing season (Richardson et al. 2013; Skomarkova et al. 2006). Additional climatic factors may be important locally (Dittmar et al. 2003; Drobyshev et al. 2010; Piovesan and Schirone 2000, Hartl-Meier et al. 2014, 2015), but are not consistently relevant across populations (Hackett-Pain et al. 2016), and so are not included in this analysis. Growth is also influenced by annual reproductive effort.

Our model also includes linkages between reproductive effort and summer temperature in the two previous summers (Vacchiano et al. 2017), as well as a link to previous year growth, as some studies have indicated that increased investment in reproductive effort maybe associated with higher growth in the previous year (Drobyshev et al. 2010). Previous summers’ temperature is the main driver of variation in seed production in *Fagus sylvatica* (Ascoli et al. 2017; Drobyshev et al. 2010; Vacchiano et al. 2017), so no linkage between current year climate and reproduction was included in our model.

Consequently, the model allows for direct effects of climate on growth, and indirect effects of previous years’ climate through an effect on allocation to reproduction.

## Appendix S5

Multivariate normality tests using the MVN package. All regions used for SEM fitting tested using three tests in the MVN package, plus graphic tests recommended in MVN vignette (MVN: An R Package for Assessing Multivariate Normality).

Where regions failed a test, and MV outliers were identified, the tests were re-applied on datasets with outliers removed. Visual inspection of the data using MVN tools indicates that all datasets were suitable for further analysis, and that any non-normality is minor.

p-values of various tests in MVN package. Red = highly significant, orange = marginally significant. Years in bold are highlighted as potential outliers in multiple regions.

|       | mariaTest<br>(chi.skew) | mariaTest<br>(chi.kurt) | hzTest    | roystonTest | Multivariate outliers?<br>(numbers = years, i.e.<br>76=1976) | Removing<br>outliers = pass<br>all tests? |
|-------|-------------------------|-------------------------|-----------|-------------|--------------------------------------------------------------|-------------------------------------------|
| UKJ   | 0.00603784              | 0.200999                | 0.1737328 | 0.4099062   | None                                                         |                                           |
| SE2   | 0.1858262               | 0.4119942               | 0.1646647 | 0.6187616   | None                                                         |                                           |
| DE1   | 0.8262608               | 0.4592369               | 0.2370057 | 0.3733476   | None                                                         |                                           |
| DE2.l | 0.2237479               | 0.8159374               | 0.4033275 | 0.1177207   | 1948, 2006, <b>2007, 2011</b> ,2013                          | NA                                        |
| DE2.h | 0.04136057              | 0.8022064               | 0.0645655 | 0.001358285 | 1953, 1978, <b>2011</b>                                      | Yes                                       |
| AT2   | 0.8246736               | 0.3149806               | 0.6652836 | 0.4614074   | None                                                         |                                           |
| AT3   | 0.9921031               | 0.4090627               | 0.8288373 | 0.1361042   | None                                                         |                                           |
| DE7   | 0.6498858               | 0.315142                | 0.1204587 | 0.1548945   | None                                                         |                                           |
| DE8   | 0.1608481               | 0.00737824              | 0.3659882 | 0.05480976  | <b>1976</b> , 1987,1992, <b>2007, 2011</b>                   | Yes                                       |
| DEA   | 0.6863757               | 0.5708077               | 0.4833007 | 0.3675073   | None                                                         |                                           |
| DEB   | 0.1276757               | 0.5638072               | 0.1408494 | 0.03196274  | <b>1976</b> , 1980, 2000                                     | Yes                                       |
| PL4   | 0.5943207               | 0.5677678               | 0.7808395 | 0.5204973   | None                                                         |                                           |
| PL6   | 0.1007822               | 0.7760077               | 0.0294171 | 0.08319151  | 1995, 1996, 2006, <b>2011</b>                                | Yes                                       |

## Appendix S6

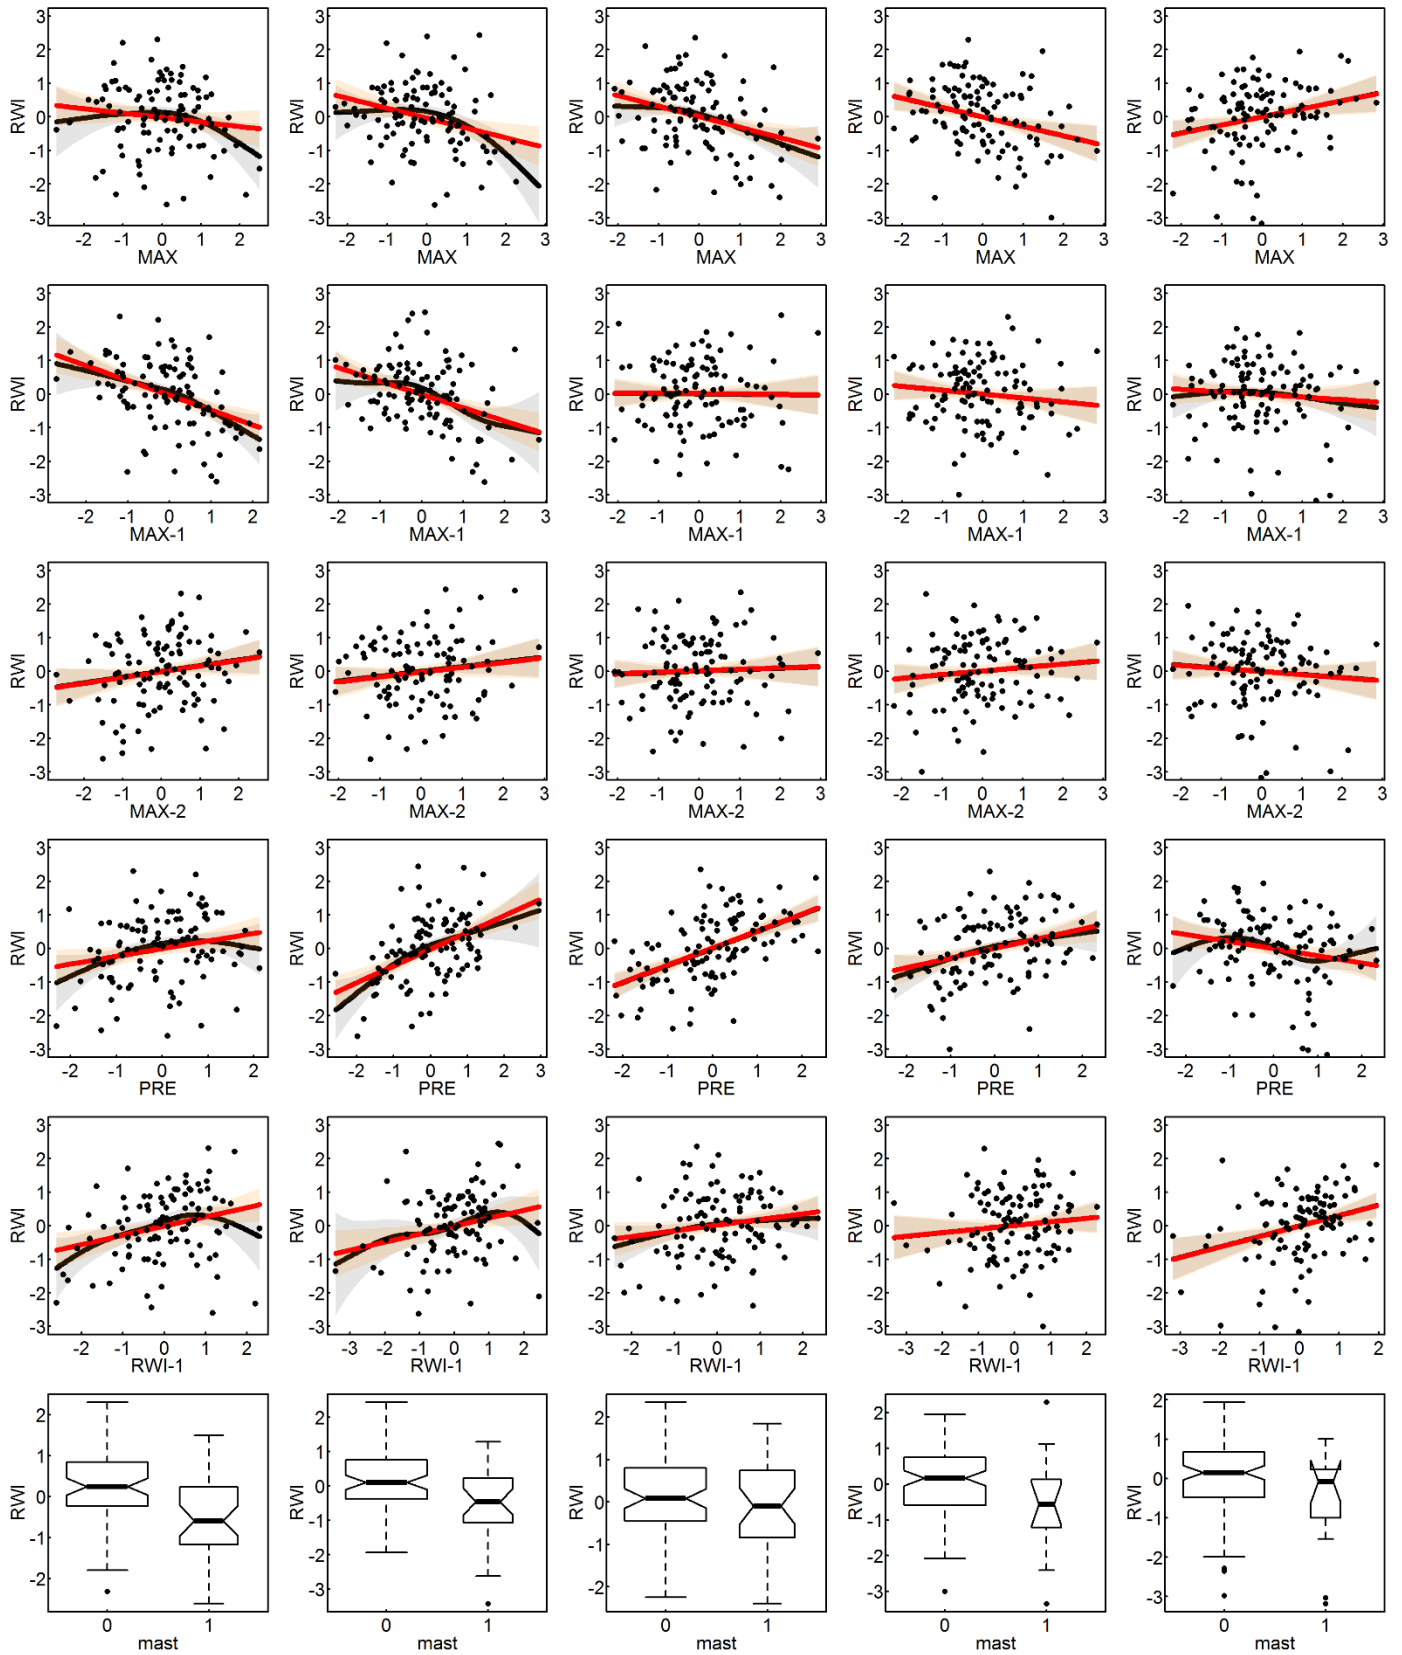

**Biplots for SE2, UKJ, DE1, DE2-low, DE2-high.** Linear models and GAMs are used to illustrate relationships between RWI and climate, previous years' growth (RWI<sub>-1</sub>) and RE (mast years) (boxplots).

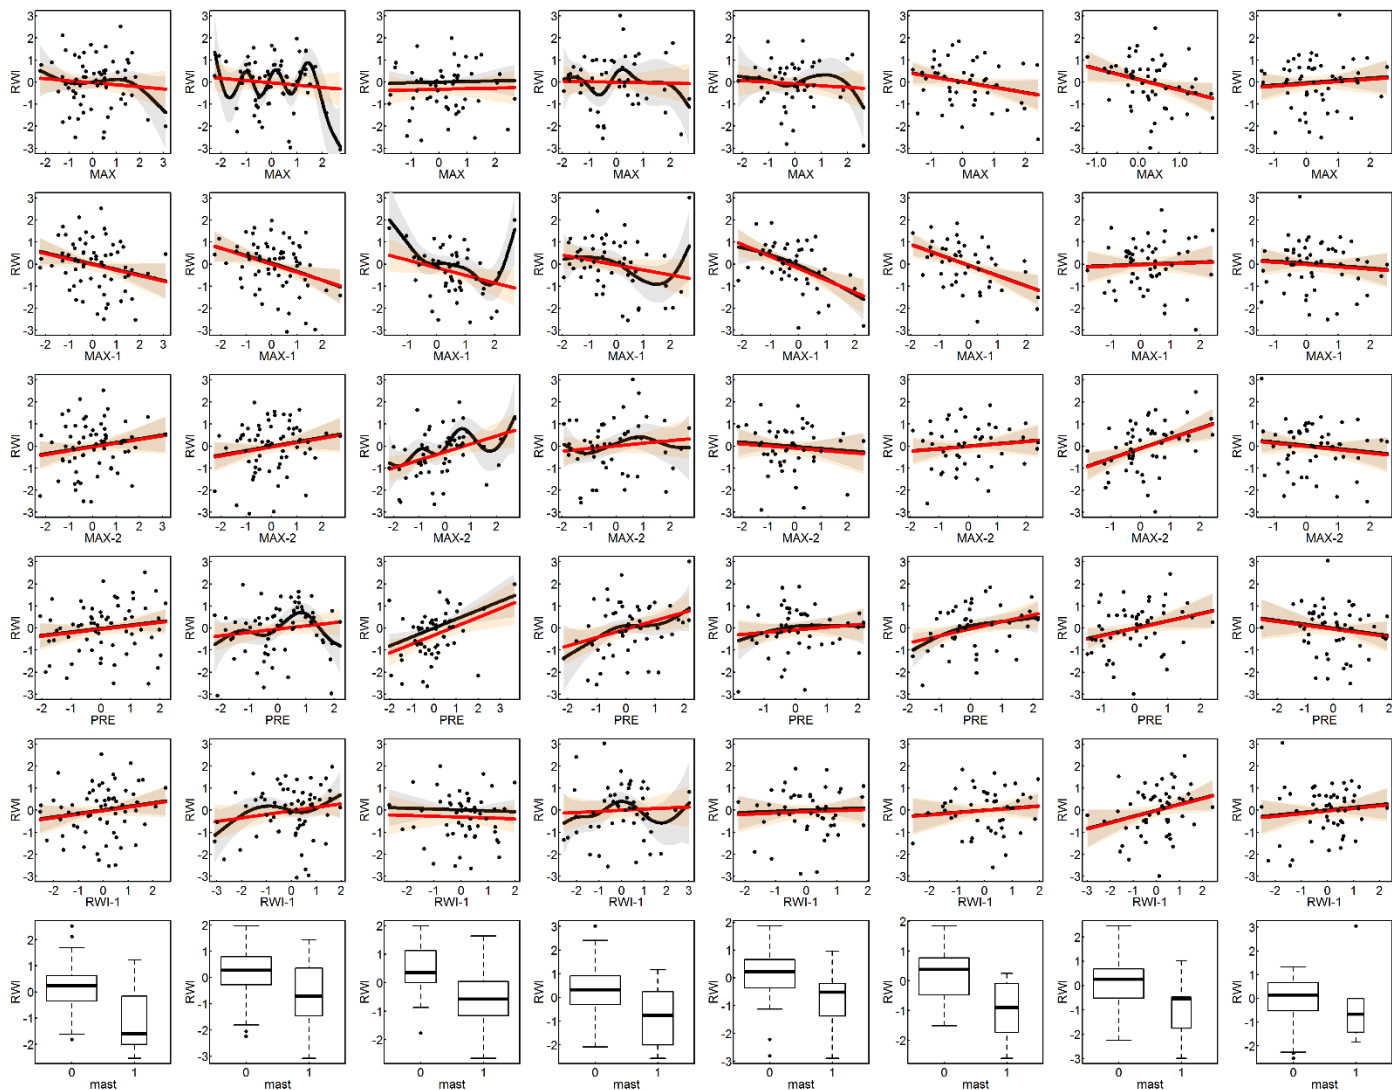

**Biplots for PL4, PL6, DE8, DEA, DEB, DE7, AT2, AT.** Linear models and GAMs are used to illustrate relationships between RWI and climate, previous years' growth ( $RWI_{-1}$ ) and  $RE$  (mast years) (boxplots).

## Appendix S7

Full model summaries for models reported in Figure 3

### UKJ

|                                          |          |         |         |          |        |         |
|------------------------------------------|----------|---------|---------|----------|--------|---------|
| Number of observations                   | Used     | Total   |         |          |        |         |
|                                          | 104      | 115     |         |          |        |         |
| Estimator                                | DWLS     |         |         |          |        |         |
| Minimum Function Test Statistic          | 10.676   |         |         |          |        |         |
| Degrees of freedom                       | 5        |         |         |          |        |         |
| P-value (Chi-square)                     | 0.058    |         |         |          |        |         |
| Model test baseline model:               |          |         |         |          |        |         |
| Minimum Function Test Statistic          | 102.532  |         |         |          |        |         |
| Degrees of freedom                       | 11       |         |         |          |        |         |
| P-value                                  | 0.000    |         |         |          |        |         |
| User model versus baseline model:        |          |         |         |          |        |         |
| Comparative Fit Index (CFI)              | 0.938    |         |         |          |        |         |
| Tucker-Lewis Index (TLI)                 | 0.864    |         |         |          |        |         |
| Root Mean Square Error of Approximation: |          |         |         |          |        |         |
| RMSEA                                    | 0.105    |         |         |          |        |         |
| 90 Percent Confidence Interval           | 0.000    | 0.193   |         |          |        |         |
| P-value RMSEA <= 0.05                    |          | 0.129   |         |          |        |         |
| Standardized Root Mean Square Residual:  |          |         |         |          |        |         |
| SRMR                                     | 0.089    |         |         |          |        |         |
| Weighted Root Mean Square Residual:      |          |         |         |          |        |         |
| WRMR                                     | 0.873    |         |         |          |        |         |
| Parameter Estimates:                     |          |         |         |          |        |         |
| Information                              |          |         |         | Expected |        |         |
| Standard Errors                          |          |         |         | Standard |        |         |
| Regressions:                             |          |         |         |          |        |         |
|                                          | Estimate | Std.Err | z-value | P(> z )  | Std.lv | Std.all |
| RWI ~                                    |          |         |         |          |        |         |
| PRE                                      | 0.495    | 0.097   | 5.082   | 0.000    | 0.495  | 0.483   |
| MAX                                      | -0.079   | 0.080   | -0.992  | 0.321    | -0.079 | -0.078  |
| mast                                     | -0.264   | 0.064   | -4.109  | 0.000    | -0.264 | -0.442  |
| RWI.lag1                                 | 0.292    | 0.074   | 3.934   | 0.000    | 0.292  | 0.289   |
| mast ~                                   |          |         |         |          |        |         |
| MAX.L                                    | 1.107    | 0.229   | 4.825   | 0.000    | 1.107  | 0.627   |
| MAX.LL                                   | -0.878   | 0.217   | -4.045  | 0.000    | -0.878 | -0.515  |
| Intercepts:                              |          |         |         |          |        |         |
|                                          | Estimate | Std.Err | z-value | P(> z )  | Std.lv | Std.all |
| .RWI                                     | -0.012   | 0.083   | -0.151  | 0.880    | -0.012 | -0.012  |
| .mast                                    | 0.000    |         |         |          | 0.000  | 0.000   |
| Thresholds:                              |          |         |         |          |        |         |
|                                          | Estimate | Std.Err | z-value | P(> z )  | Std.lv | Std.all |
| mast t1                                  | 1.074    | 0.247   | 4.343   | 0.000    | 1.074  | 0.634   |
| Variances:                               |          |         |         |          |        |         |
|                                          | Estimate | Std.Err | z-value | P(> z )  | Std.lv | Std.all |
| .RWI                                     | 0.487    | 0.092   | 5.293   | 0.000    | 0.487  | 0.476   |
| .mast                                    | 1.000    |         |         |          | 1.000  | 0.348   |
| Scales y*:                               |          |         |         |          |        |         |
|                                          | Estimate | Std.Err | z-value | P(> z )  | Std.lv | Std.all |
| mast                                     | 1.000    |         |         |          | 1.000  | 1.000   |
| R-Square:                                |          |         |         |          |        |         |
|                                          | Estimate |         |         |          |        |         |
| RWI                                      | 0.524    |         |         |          |        |         |
| mast                                     | 0.652    |         |         |          |        |         |



SE2

|                                          |                   |         |         |         |        |         |
|------------------------------------------|-------------------|---------|---------|---------|--------|---------|
| Number of observations                   | Used              | Total   |         |         |        |         |
|                                          | 103               | 115     |         |         |        |         |
| Estimator                                | DWLS              |         |         |         |        |         |
| Minimum Function Test Statistic          | 1.489             |         |         |         |        |         |
| Degrees of freedom                       | 5                 |         |         |         |        |         |
| P-value (Chi-square)                     | 0.914             |         |         |         |        |         |
| Model test baseline model:               |                   |         |         |         |        |         |
| Minimum Function Test Statistic          | 85.804            |         |         |         |        |         |
| Degrees of freedom                       | 11                |         |         |         |        |         |
| P-value                                  | 0.000             |         |         |         |        |         |
| User model versus baseline model:        |                   |         |         |         |        |         |
| Comparative Fit Index (CFI)              | 1.000             |         |         |         |        |         |
| Tucker-Lewis Index (TLI)                 | 1.103             |         |         |         |        |         |
| Root Mean Square Error of Approximation: |                   |         |         |         |        |         |
| RMSEA                                    | 0.000             | 0.000   |         |         |        |         |
| 90 Percent Confidence Interval           | 0.000             | 0.051   |         |         |        |         |
| P-value RMSEA <= 0.05                    |                   | 0.949   |         |         |        |         |
| Standardized Root Mean Square Residual:  |                   |         |         |         |        |         |
| SRMR                                     | 0.015             |         |         |         |        |         |
| Weighted Root Mean Square Residual:      |                   |         |         |         |        |         |
| WRMR                                     | 0.326             |         |         |         |        |         |
| Parameter Estimates:                     |                   |         |         |         |        |         |
| Information Standard Errors              | Expected Standard |         |         |         |        |         |
| Regressions:                             |                   |         |         |         |        |         |
|                                          | Estimate          | Std.Err | z-value | P(> z ) | Std.lv | Std.all |
| RWI ~                                    |                   |         |         |         |        |         |
| PRE                                      | 0.224             | 0.096   | 2.340   | 0.019   | 0.224  | 0.219   |
| MAX                                      | -0.131            | 0.103   | -1.269  | 0.204   | -0.131 | -0.131  |
| mast                                     | -0.297            | 0.063   | -4.709  | 0.000   | -0.297 | -0.567  |
| RWI.lag1                                 | 0.348             | 0.096   | 3.616   | 0.000   | 0.348  | 0.358   |
| mast ~                                   |                   |         |         |         |        |         |
| MAX.L                                    | 1.038             | 0.198   | 5.251   | 0.000   | 1.038  | 0.534   |
| MAX.LL                                   | -1.121            | 0.238   | -4.709  | 0.000   | -1.121 | -0.604  |
| Intercepts:                              |                   |         |         |         |        |         |
|                                          | Estimate          | Std.Err | z-value | P(> z ) | Std.lv | Std.all |
| .RWI                                     | -0.021            | 0.088   | -0.240  | 0.810   | -0.021 | -0.021  |
| .mast                                    | 0.000             |         |         |         | 0.000  | 0.000   |
| Thresholds:                              |                   |         |         |         |        |         |
|                                          | Estimate          | Std.Err | z-value | P(> z ) | Std.lv | Std.all |
| mast t1                                  | 0.802             | 0.221   | 3.631   | 0.000   | 0.802  | 0.425   |
| Variances:                               |                   |         |         |         |        |         |
|                                          | Estimate          | Std.Err | z-value | P(> z ) | Std.lv | Std.all |
| .RWI                                     | 0.561             | 0.094   | 5.998   | 0.000   | 0.561  | 0.574   |
| .mast                                    | 1.000             |         |         |         | 1.000  | 0.281   |
| Scales y*:                               |                   |         |         |         |        |         |
|                                          | Estimate          | Std.Err | z-value | P(> z ) | Std.lv | Std.all |
| mast                                     | 1.000             |         |         |         | 1.000  | 1.000   |
| R-Square:                                |                   |         |         |         |        |         |
|                                          | Estimate          |         |         |         |        |         |
| RWI                                      | 0.426             |         |         |         |        |         |
| mast                                     | 0.719             |         |         |         |        |         |

**DE1**

|                                          |          |         |         |         |        |         |
|------------------------------------------|----------|---------|---------|---------|--------|---------|
| Number of observations                   | Used     | Total   |         |         |        |         |
|                                          | 108      | 115     |         |         |        |         |
| Estimator                                | DWLS     |         |         |         |        |         |
| Minimum Function Test Statistic          | 2.920    |         |         |         |        |         |
| Degrees of freedom                       | 5        |         |         |         |        |         |
| P-value (Chi-square)                     | 0.712    |         |         |         |        |         |
| Model test baseline model:               |          |         |         |         |        |         |
| Minimum Function Test Statistic          | 57.475   |         |         |         |        |         |
| Degrees of freedom                       | 11       |         |         |         |        |         |
| P-value                                  | 0.000    |         |         |         |        |         |
| User model versus baseline model:        |          |         |         |         |        |         |
| Comparative Fit Index (CFI)              | 1.000    |         |         |         |        |         |
| Tucker-Lewis Index (TLI)                 | 1.098    |         |         |         |        |         |
| Root Mean Square Error of Approximation: |          |         |         |         |        |         |
| RMSEA                                    | 0.000    | 0.000   |         |         |        |         |
| 90 Percent Confidence Interval           | 0.000    | 0.100   |         |         |        |         |
| P-value RMSEA <= 0.05                    |          | 0.812   |         |         |        |         |
| Standardized Root Mean Square Residual:  |          |         |         |         |        |         |
| SRMR                                     | 0.081    |         |         |         |        |         |
| Weighted Root Mean Square Residual:      |          |         |         |         |        |         |
| WRMR                                     | 0.457    |         |         |         |        |         |
| Parameter Estimates:                     |          |         |         |         |        |         |
| Information                              | Expected |         |         |         |        |         |
| Standard Errors                          | Standard |         |         |         |        |         |
| Regressions:                             |          |         |         |         |        |         |
|                                          | Estimate | Std.Err | z-value | P(> z ) | Std.lv | Std.all |
| RWI ~                                    |          |         |         |         |        |         |
| PRE                                      | 0.497    | 0.118   | 4.224   | 0.000   | 0.497  | 0.507   |
| MAX                                      | -0.136   | 0.092   | -1.488  | 0.137   | -0.136 | -0.138  |
| mast                                     | -0.053   | 0.053   | -1.011  | 0.312   | -0.053 | -0.090  |
| RWI.lag1                                 | 0.256    | 0.119   | 2.163   | 0.031   | 0.256  | 0.256   |
| mast ~                                   |          |         |         |         |        |         |
| MAX.L                                    | 0.861    | 0.275   | 3.136   | 0.002   | 0.861  | 0.514   |
| MAX.LL                                   | -1.159   | 0.271   | -4.275  | 0.000   | -1.159 | -0.692  |
| Intercepts:                              |          |         |         |         |        |         |
|                                          | Estimate | Std.Err | z-value | P(> z ) | Std.lv | Std.all |
| .RWI                                     | 0.007    | 0.082   | 0.091   | 0.928   | 0.007  | 0.007   |
| .mast                                    | 0.000    |         |         |         | 0.000  | 0.000   |
| Thresholds:                              |          |         |         |         |        |         |
|                                          | Estimate | Std.Err | z-value | P(> z ) | Std.lv | Std.all |
| mast t1                                  | 0.891    | 0.209   | 4.256   | 0.000   | 0.891  | 0.531   |
| Variances:                               |          |         |         |         |        |         |
|                                          | Estimate | Std.Err | z-value | P(> z ) | Std.lv | Std.all |
| .RWI                                     | 0.638    | 0.077   | 8.324   | 0.000   | 0.638  | 0.639   |
| .mast                                    | 1.000    |         |         |         | 1.000  | 0.355   |
| Scales y*:                               |          |         |         |         |        |         |
|                                          | Estimate | Std.Err | z-value | P(> z ) | Std.lv | Std.all |
| mast                                     | 1.000    |         |         |         | 1.000  | 1.000   |
| R-Square:                                |          |         |         |         |        |         |
|                                          | Estimate |         |         |         |        |         |
| RWI                                      | 0.361    |         |         |         |        |         |
| mast                                     | 0.645    |         |         |         |        |         |

**DE2-low**

|                                          |                   |         |         |         |        |         |
|------------------------------------------|-------------------|---------|---------|---------|--------|---------|
| Number of observations                   | Used              | Total   |         |         |        |         |
|                                          | 111               | 115     |         |         |        |         |
| Estimator                                | DWLS              |         |         |         |        |         |
| Minimum Function Test Statistic          | 0.896             |         |         |         |        |         |
| Degrees of freedom                       | 5                 |         |         |         |        |         |
| P-value (Chi-square)                     | 0.971             |         |         |         |        |         |
| Model test baseline model:               |                   |         |         |         |        |         |
| Minimum Function Test Statistic          | 30.463            |         |         |         |        |         |
| Degrees of freedom                       | 11                |         |         |         |        |         |
| P-value                                  | 0.001             |         |         |         |        |         |
| User model versus baseline model:        |                   |         |         |         |        |         |
| Comparative Fit Index (CFI)              | 1.000             |         |         |         |        |         |
| Tucker-Lewis Index (TLI)                 | 1.464             |         |         |         |        |         |
| Root Mean Square Error of Approximation: |                   |         |         |         |        |         |
| RMSEA                                    | 0.000             | 0.000   |         |         |        |         |
| 90 Percent Confidence Interval           | 0.000             | 0.000   |         |         |        |         |
| P-value RMSEA <= 0.05                    | 0.984             |         |         |         |        |         |
| Standardized Root Mean Square Residual:  |                   |         |         |         |        |         |
| SRMR                                     | 0.015             |         |         |         |        |         |
| Weighted Root Mean Square Residual:      |                   |         |         |         |        |         |
| WRMR                                     | 0.253             |         |         |         |        |         |
| Parameter Estimates:                     |                   |         |         |         |        |         |
| Information Standard Errors              | Expected Standard |         |         |         |        |         |
| Regressions:                             |                   |         |         |         |        |         |
|                                          | Estimate          | Std.Err | z-value | P(> z ) | Std.lv | Std.all |
| RWI ~                                    |                   |         |         |         |        |         |
| PRE                                      | 0.215             | 0.126   | 1.704   | 0.088   | 0.215  | 0.215   |
| MAX                                      | -0.176            | 0.110   | -1.597  | 0.110   | -0.176 | -0.175  |
| mast                                     | -0.215            | 0.080   | -2.695  | 0.007   | -0.215 | -0.266  |
| RWI.lag1                                 | 0.126             | 0.111   | 1.128   | 0.259   | 0.126  | 0.123   |
| mast ~                                   |                   |         |         |         |        |         |
| MAX.L                                    | 0.505             | 0.147   | 3.441   | 0.001   | 0.505  | 0.402   |
| MAX.LL                                   | -0.632            | 0.315   | -2.007  | 0.045   | -0.632 | -0.503  |
| Intercepts:                              |                   |         |         |         |        |         |
|                                          | Estimate          | Std.Err | z-value | P(> z ) | Std.lv | Std.all |
| .RWI                                     | 0.004             | 0.096   | 0.041   | 0.967   | 0.004  | 0.004   |
| .mast                                    | 0.000             |         |         |         | 0.000  | 0.000   |
| Thresholds:                              |                   |         |         |         |        |         |
|                                          | Estimate          | Std.Err | z-value | P(> z ) | Std.lv | Std.all |
| mast t1                                  | 1.563             | 0.318   | 4.915   | 0.000   | 1.563  | 1.248   |
| Variances:                               |                   |         |         |         |        |         |
|                                          | Estimate          | Std.Err | z-value | P(> z ) | Std.lv | Std.all |
| .RWI                                     | 0.813             | 0.104   | 7.806   | 0.000   | 0.813  | 0.799   |
| .mast                                    | 1.000             |         |         |         | 1.000  | 0.637   |
| Scales y*:                               |                   |         |         |         |        |         |
|                                          | Estimate          | Std.Err | z-value | P(> z ) | Std.lv | Std.all |
| mast                                     | 1.000             |         |         |         | 1.000  | 1.000   |
| R-Square:                                |                   |         |         |         |        |         |
|                                          | Estimate          |         |         |         |        |         |
| RWI                                      | 0.201             |         |         |         |        |         |
| mast                                     | 0.363             |         |         |         |        |         |

## DE2-high

|                                          |          |         |         |          |        |         |
|------------------------------------------|----------|---------|---------|----------|--------|---------|
| Number of observations                   | Used     | Total   |         |          |        |         |
|                                          | 109      | 115     |         |          |        |         |
| Estimator                                | DWLS     |         |         |          |        |         |
| Minimum Function Test Statistic          | 5.869    |         |         |          |        |         |
| Degrees of freedom                       | 5        |         |         |          |        |         |
| P-value (Chi-square)                     | 0.319    |         |         |          |        |         |
| Model test baseline model:               |          |         |         |          |        |         |
| Minimum Function Test Statistic          | 42.611   |         |         |          |        |         |
| Degrees of freedom                       | 11       |         |         |          |        |         |
| P-value                                  | 0.000    |         |         |          |        |         |
| User model versus baseline model:        |          |         |         |          |        |         |
| Comparative Fit Index (CFI)              | 0.973    |         |         |          |        |         |
| Tucker-Lewis Index (TLI)                 | 0.940    |         |         |          |        |         |
| Root Mean Square Error of Approximation: |          |         |         |          |        |         |
| RMSEA                                    | 0.040    |         |         |          |        |         |
| 90 Percent Confidence Interval           | 0.000    | 0.144   |         |          |        |         |
| P-value RMSEA <= 0.05                    | 0.469    |         |         |          |        |         |
| Standardized Root Mean Square Residual:  |          |         |         |          |        |         |
| SRMR                                     | 0.027    |         |         |          |        |         |
| Weighted Root Mean Square Residual:      |          |         |         |          |        |         |
| WRMR                                     | 0.647    |         |         |          |        |         |
| Parameter Estimates:                     |          |         |         |          |        |         |
| Information                              |          |         |         | Expected |        |         |
| Standard Errors                          |          |         |         | Standard |        |         |
| Regressions:                             |          |         |         |          |        |         |
|                                          | Estimate | Std.Err | z-value | P(> z )  | Std.lv | Std.all |
| RWI ~                                    |          |         |         |          |        |         |
| PRE                                      | -0.109   | 0.117   | -0.928  | 0.354    | -0.109 | -0.111  |
| MAX                                      | 0.170    | 0.115   | 1.480   | 0.139    | 0.170  | 0.171   |
| mast                                     | -0.156   | 0.080   | -1.956  | 0.050    | -0.156 | -0.203  |
| RWI.lag1                                 | 0.331    | 0.086   | 3.871   | 0.000    | 0.331  | 0.320   |
| mast ~                                   |          |         |         |          |        |         |
| MAX.L                                    | 0.742    | 0.207   | 3.576   | 0.000    | 0.742  | 0.570   |
| MAX.LL                                   | -0.496   | 0.332   | -1.493  | 0.136    | -0.496 | -0.378  |
| Intercepts:                              |          |         |         |          |        |         |
|                                          | Estimate | Std.Err | z-value | P(> z )  | Std.lv | Std.all |
| .RWI                                     | -0.015   | 0.101   | -0.149  | 0.882    | -0.015 | -0.015  |
| .mast                                    | 0.000    |         |         |          | 0.000  | 0.000   |
| Thresholds:                              |          |         |         |          |        |         |
|                                          | Estimate | Std.Err | z-value | P(> z )  | Std.lv | Std.all |
| mast t1                                  | 1.661    | 0.348   | 4.776   | 0.000    | 1.661  | 1.275   |
| Variances:                               |          |         |         |          |        |         |
|                                          | Estimate | Std.Err | z-value | P(> z )  | Std.lv | Std.all |
| .RWI                                     | 0.805    | 0.126   | 6.386   | 0.000    | 0.805  | 0.809   |
| .mast                                    | 1.000    |         |         |          | 1.000  | 0.589   |
| Scales y*:                               |          |         |         |          |        |         |
|                                          | Estimate | Std.Err | z-value | P(> z )  | Std.lv | Std.all |
| mast                                     | 1.000    |         |         |          | 1.000  | 1.000   |
| R-Square:                                |          |         |         |          |        |         |
|                                          | Estimate |         |         |          |        |         |
| RWI                                      | 0.191    |         |         |          |        |         |
| mast                                     | 0.411    |         |         |          |        |         |

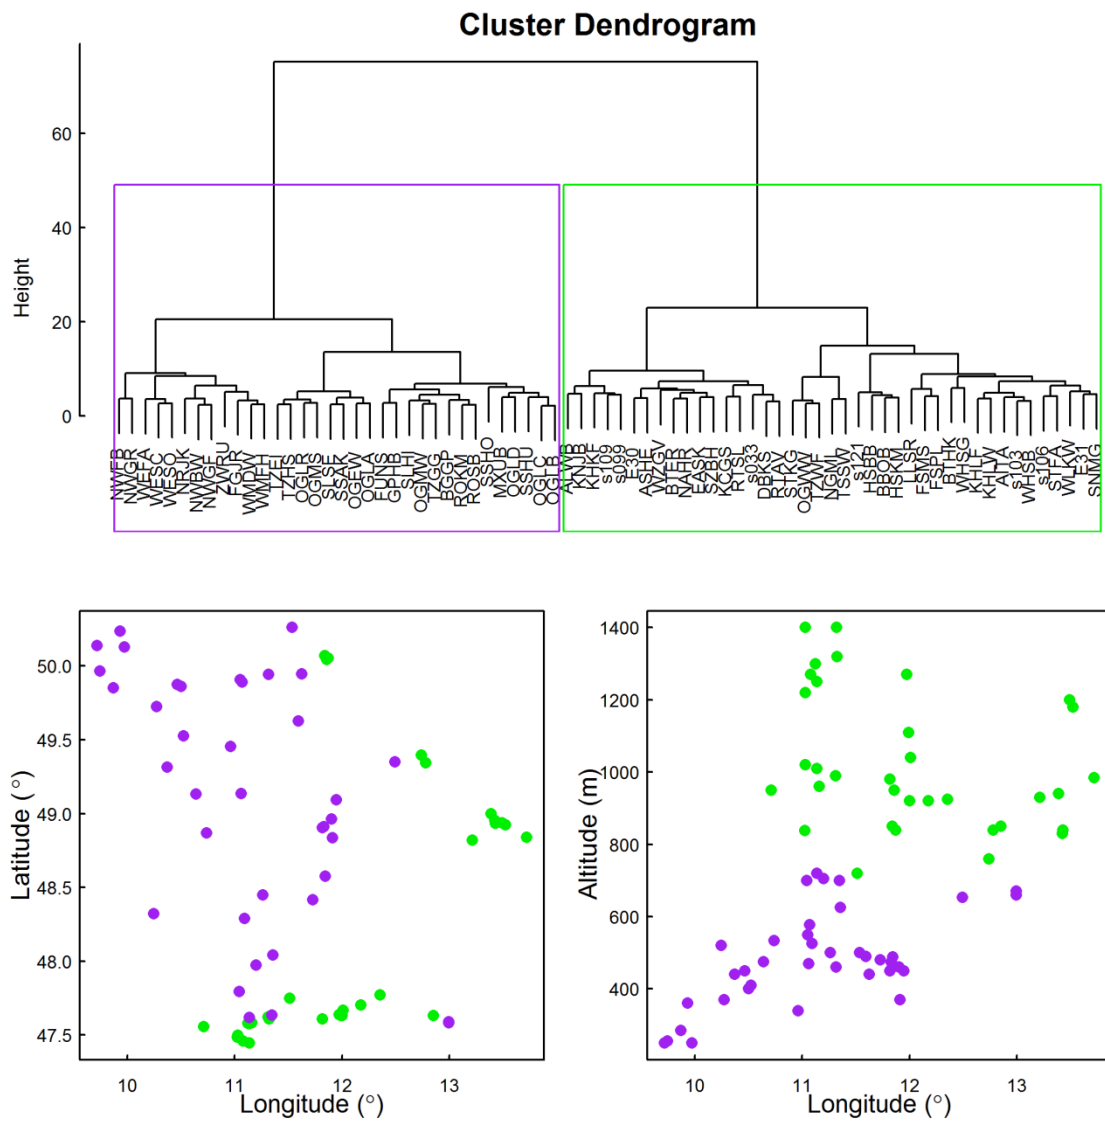

Cluster analysis of the DE2 chronologies, and the two main groups mapped and plotted against elevation. Purple = DE2-low, Green = DE2-high. Chronologies were analysed using Wards Hierarchical clustering, with Euclidean distances. Analysis was restricted to the period of common overlap between all chronologies.

## Appendix S9

### UKJ

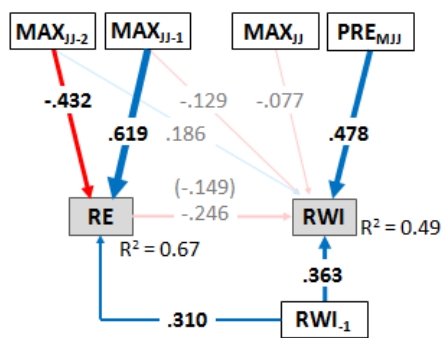

$\chi^2 = 4.271; p = 0.118$   
DF = 2; n = 104

### SE2

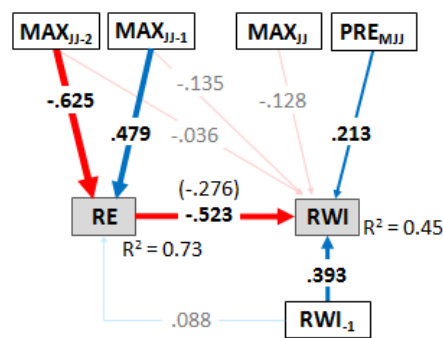

$\chi^2 = 0.086; p = 0.958$   
DF = 2; n = 103

### DE1

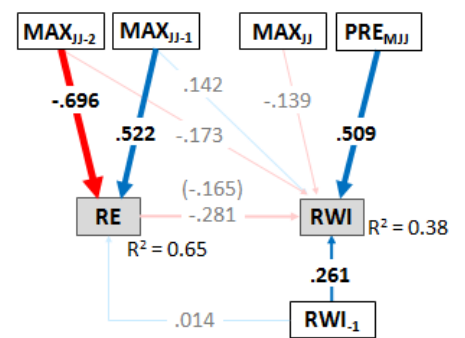

$\chi^2 = 1.282; p = 0.527$   
DF = 2; n = 108

### DE2-low

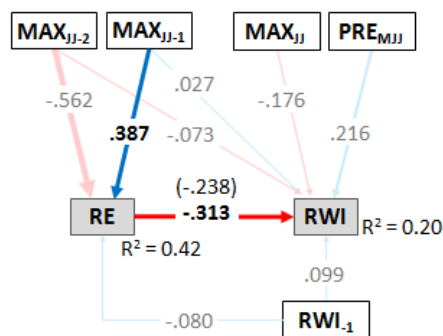

$\chi^2 = 0.508; p = 0.776$   
DF = 2; n = 111

### DE2-high

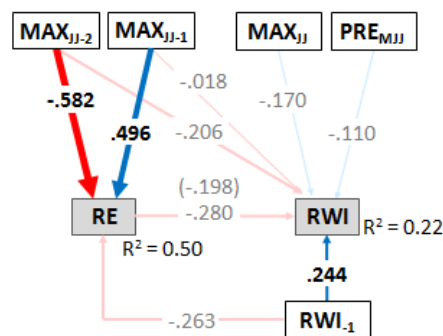

$\chi^2 = 0.903; p = 0.637$   
DF = 2; n = 109

Structural Equation Models/Path analysis diagrams representing the effects of temperature and precipitation on radial growth, with indirect pathways involving the effects of allocation to reproduction (*RE*). The model structure presented here corresponds to the full theoretical model presented in Figure 1. Blue and red arrows indicate positive and negative relationships, respectively. Numbers on the arrows indicate the standardized path coefficients, with arrow thickness proportional to the coefficient strength. Pale colours indicate non-significant pathways ( $p < 0.05$ ). The proportion of explained variance ( $R^2$ ) for each endogenous variable is also shown.

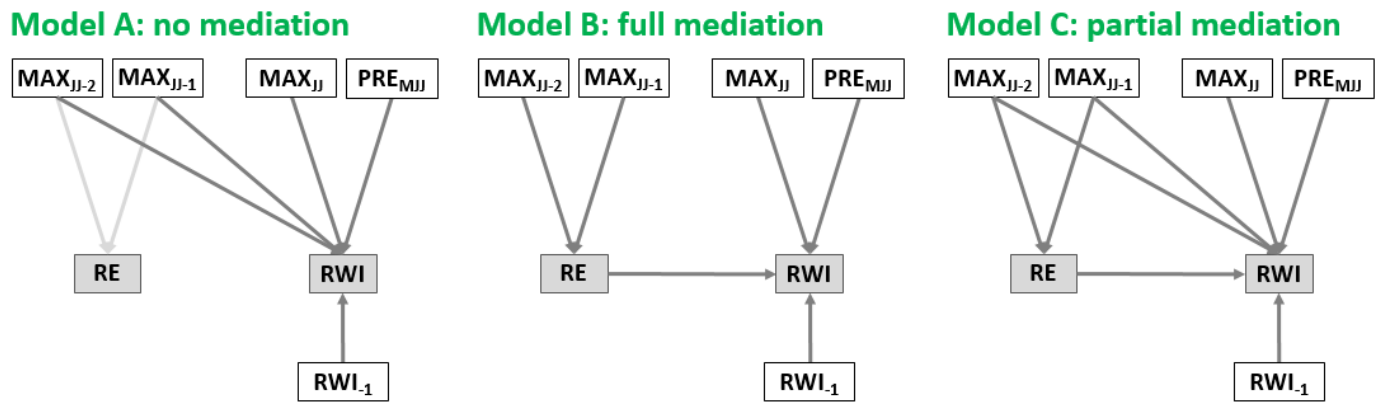

Models based on alternative linkages between previous summers’ temperature and growth.

**Model A: no mediation model.** Model A describes the situation where RWI is modelled only as a function of climate variables and previous year RWI; i.e. masting is not a predictor of tree growth, but previous summers’ temperature influence growth directly

**Model B: full mediation model.** Model B describes the situation where RWI is modelled only as a function of growing climate variables, previous year RWI and masting. Previous summers’ temperature can only influence RWI indirectly, through their effect on mast.

**Model C: partial mediation model.** Model C describes the situation where RWI is modelled as a function of climate variables (in the year of growth and previous years), previous year RWI and masting; i.e. previous summers’ temperature can influence RWI directly and indirectly through mast. Model C therefore represents a combination of Model A and B.

Mediation analysis is used as a formal comparison of the performance of these three difference models for each of the five chronologies analysed.

Mediation analysis

| SE2                   | R <sup>2</sup> <sub>RWI</sub> | X <sup>2</sup> | X <sup>2</sup> diff | p-value |
|-----------------------|-------------------------------|----------------|---------------------|---------|
| C (Partial mediation) | 0.441                         | 0.9308         |                     |         |
| A (No mediation)      | 0.370                         | 10.7144        | 9.7836              | 0.0018* |
| B (Full mediation)    | 0.425                         | 1.5368         | -9.1776             | 1.0000  |
| UKJ                   | R <sup>2</sup> <sub>RWI</sub> | X <sup>2</sup> | X <sup>2</sup> diff | p-value |
| C (Partial mediation) | 0.489                         | 8.7415         |                     |         |
| A (No mediation)      | 0.467                         | 10.4375        | 1.69591             | 0.1928  |
| B (Full mediation)    | 0.524                         | 10.6764        | 0.23891             | 0.6250  |
| DE1                   | R <sup>2</sup> <sub>RWI</sub> | X <sup>2</sup> | X <sup>2</sup> diff | p-value |
| C (Partial mediation) | 0.382                         | 1.2959         |                     |         |
| A (No mediation)      | 0.354                         | 3.8835         | 2.58756             | 0.1077  |
| B (Full mediation)    | 0.361                         | 2.9200         | -0.96348            | 1.0000  |
| DE2 - high            | R <sup>2</sup> <sub>RWI</sub> | X <sup>2</sup> | X <sup>2</sup> diff | p-value |
| C (Partial mediation) | 0.215                         | 2.9706         |                     |         |
| A (No mediation)      | 0.176                         | 5.9652         | 2.99454             | 0.0836  |
| B (Full mediation)    | 0.191                         | 5.8688         | -0.09638            | 1.0000  |
| DE2 - low             | R <sup>2</sup> <sub>RWI</sub> | X <sup>2</sup> | X <sup>2</sup> diff | p-value |
| C (Partial mediation) | 0.204                         | 0.6268         |                     |         |
| A (No mediation)      | 0.147                         | 0.70732        | 6.4464              | 0.0111* |
| B (Full mediation)    | 0.201                         | 0.8958         | -6.1775             | 1.0000  |

In all five cases, the model C and B are statistically indistinguishable, and including the direct links between previous summers’ temperature and RWI does not increase model performance.

Additionally, in SE2 and DE2-low, the model where RWI is modelled as a function of climate and previous years RWI (and not RE) performs significantly worse than models that do include RE. In DE2-high, this improvement is marginally insignificant.

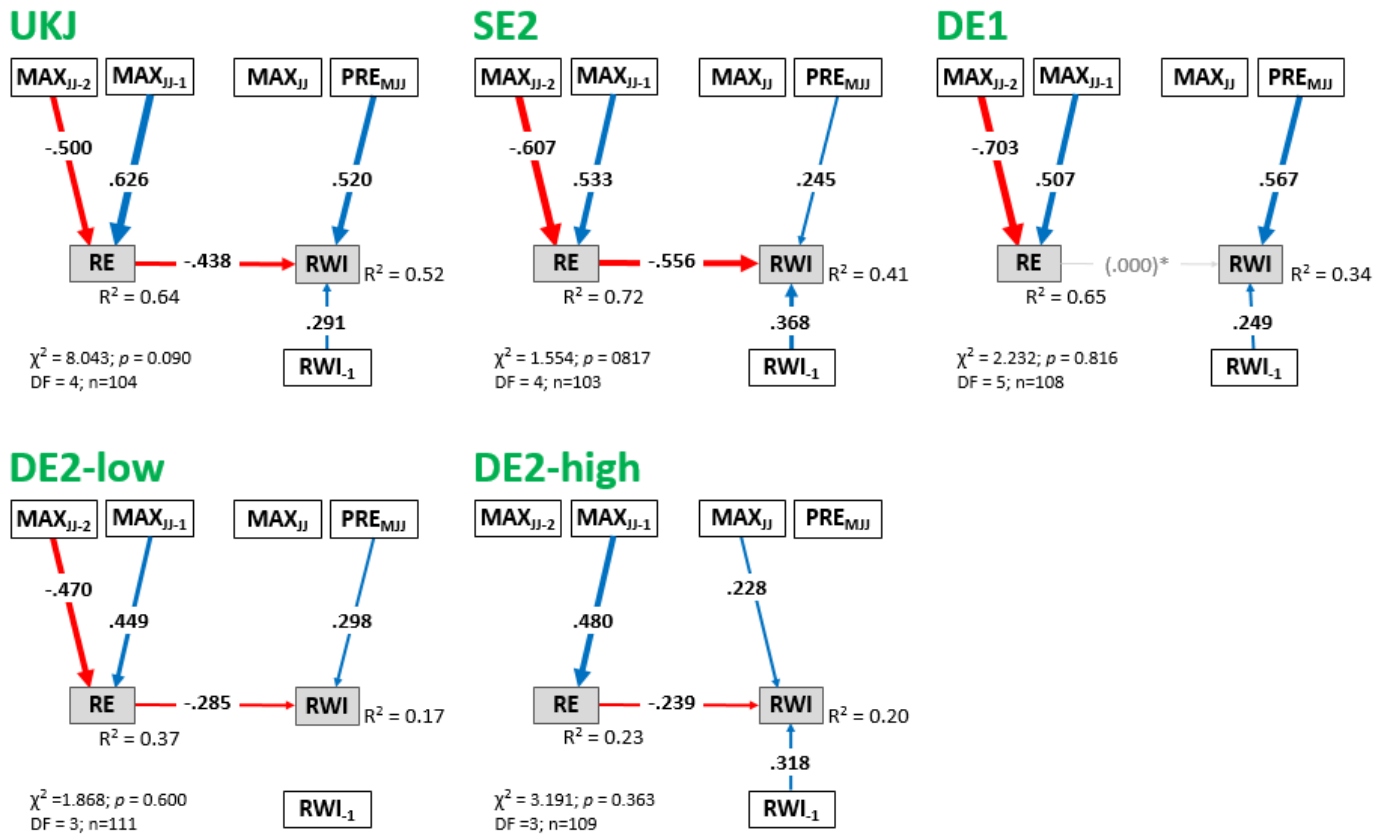

**Figure 3c:** Structural Equation Models/Path analysis diagrams representing the effects of temperature and precipitation on radial growth, with indirect pathways involving the effects of allocation to reproduction (*RE*). Following mediation analysis, direct pathways from  $MAX_{JJ-1}$  and  $MAX_{JJ-2}$  to *RWI*, and from  $RWI_{-1}$  to *RE*, have been removed. Additional insignificant linkages are also removed from individual models, unless they significantly reduce the model GOF. Blue and red arrows indicate positive and negative relationships, respectively. Numbers on the arrows indicate the standardized path coefficients, with arrow thickness proportional to the coefficient strength. Pale colours indicate non-significant pathways ( $p < 0.05$ ). The proportion of explained variance ( $R^2$ ) for each endogenous variable is also shown.



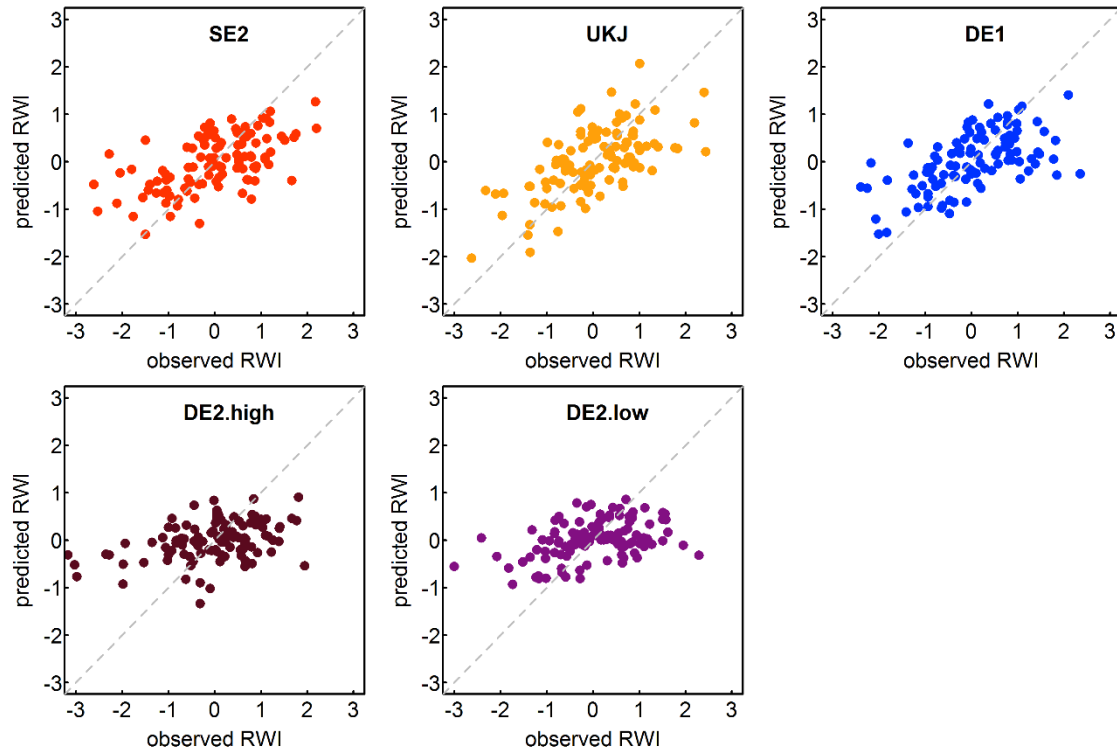

Scatterplots of observed and predicted RWI for the five model development regions, corresponding to the data presented in Figure 4.

## Appendix S13

### Multigroup

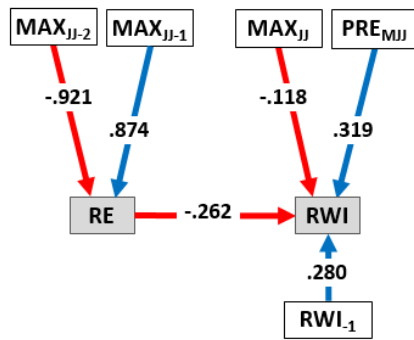

Multi-group model used for the prediction of RWI in 16 independent regions (Figure 6). Raw coefficients are plotted, as used in the predictive model.

|                                  |        |
|----------------------------------|--------|
| Number of observations per group |        |
| UKJ                              | 104    |
| SE2                              | 103    |
| DE2.1                            | 111    |
| Estimator                        | DWLS   |
| Minimum Function Test Statistic  | 42.305 |
| Degrees of freedom               | 31     |
| P-value (Chi-square)             | 0.085  |

Chi-square for each group:

|       |        |
|-------|--------|
| UKJ   | 17.583 |
| SE2   | 7.867  |
| DE2.1 | 16.855 |

Parameter Estimates:

|                 |          |
|-----------------|----------|
| Information     | Expected |
| Standard Errors | Standard |

Group 1 [UKJ]:

Regressions:

|                | Estimate | Std.Err | z-value | P(> z ) | Std.lv | Std.all |
|----------------|----------|---------|---------|---------|--------|---------|
| RWI ~          |          |         |         |         |        |         |
| PRE (.p1.)     | 0.319    | 0.061   | 5.212   | 0.000   | 0.319  | 0.319   |
| mast (.p2.)    | -0.262   | 0.038   | -6.894  | 0.000   | -0.262 | -0.421  |
| RWI.lg1 (.p3.) | 0.280    | 0.052   | 5.365   | 0.000   | 0.280  | 0.285   |
| MAX (.p4.)     | -0.118   | 0.055   | -2.137  | 0.033   | -0.118 | -0.119  |
| mast ~         |          |         |         |         |        |         |
| MAX.L (.p5.)   | 0.874    | 0.131   | 6.663   | 0.000   | 0.874  | 0.528   |
| MAX.LL (.p6.)  | -0.921   | 0.150   | -6.136  | 0.000   | -0.921 | -0.576  |

Intercepts:

|             | Estimate | Std.Err | z-value | P(> z ) | Std.lv | Std.all |
|-------------|----------|---------|---------|---------|--------|---------|
| .RWI (.11.) | -0.011   | 0.051   | -0.222  | 0.825   | -0.011 | -0.011  |
| .mast       | 0.000    |         |         |         | 0.000  | 0.000   |

Thresholds:

|                | Estimate | Std.Err | z-value | P(> z ) | Std.lv | Std.all |
|----------------|----------|---------|---------|---------|--------|---------|
| mast t1 (.p7.) | 1.091    | 0.179   | 6.099   | 0.000   | 1.091  | 0.687   |

Variances:

|             | Estimate | Std.Err | z-value | P(> z ) | Std.lv | Std.all |
|-------------|----------|---------|---------|---------|--------|---------|
| .RWI (.p8.) | 0.607    | 0.055   | 10.982  | 0.000   | 0.607  | 0.624   |
| .mast       | 1.000    |         |         |         | 1.000  | 0.396   |

Scales y\*:

|      | Estimate | Std.Err | z-value | P(> z ) | Std.lv | Std.all |
|------|----------|---------|---------|---------|--------|---------|
| mast | 1.000    |         |         |         | 1.000  | 1.000   |

R-Square:

|      | Estimate |
|------|----------|
| RWI  | 0.376    |
| mast | 0.604    |

Group 2 [SE2]:

Regressions:

|         |        | Estimate | Std.Err | z-value | P(> z ) | Std.lv | Std.all |
|---------|--------|----------|---------|---------|---------|--------|---------|
| RWI ~   |        |          |         |         |         |        |         |
| PRE     | (.p1.) | 0.319    | 0.061   | 5.212   | 0.000   | 0.319  | 0.318   |
| mast    | (.p2.) | -0.262   | 0.038   | -6.894  | 0.000   | -0.262 | -0.447  |
| RWI.lg1 | (.p3.) | 0.280    | 0.052   | 5.365   | 0.000   | 0.280  | 0.293   |
| MAX     | (.p4.) | -0.118   | 0.055   | -2.137  | 0.033   | -0.118 | -0.121  |
| mast ~  |        |          |         |         |         |        |         |
| MAX.L   | (.p5.) | 0.874    | 0.131   | 6.663   | 0.000   | 0.874  | 0.510   |
| MAX.LL  | (.p6.) | -0.921   | 0.150   | -6.136  | 0.000   | -0.921 | -0.563  |

Intercepts:

|       |        | Estimate | Std.Err | z-value | P(> z ) | Std.lv | Std.all |
|-------|--------|----------|---------|---------|---------|--------|---------|
| .RWI  | (.11.) | -0.011   | 0.051   | -0.222  | 0.825   | -0.011 | -0.012  |
| .mast |        | 0.000    |         |         |         | 0.000  | 0.000   |

Thresholds:

|         |        | Estimate | Std.Err | z-value | P(> z ) | Std.lv | Std.all |
|---------|--------|----------|---------|---------|---------|--------|---------|
| mast t1 | (.p7.) | 1.091    | 0.179   | 6.099   | 0.000   | 1.091  | 0.656   |

Variances:

|       |        | Estimate | Std.Err | z-value | P(> z ) | Std.lv | Std.all |
|-------|--------|----------|---------|---------|---------|--------|---------|
| .RWI  | (.p8.) | 0.607    | 0.055   | 10.982  | 0.000   | 0.607  | 0.641   |
| .mast |        | 1.003    |         |         |         | 1.003  | 0.362   |

Scales y\*:

|      |  | Estimate | Std.Err | z-value | P(> z ) | Std.lv | Std.all |
|------|--|----------|---------|---------|---------|--------|---------|
| mast |  | 0.999    | 0.160   | 6.250   | 0.000   | 0.999  | 1.000   |

R-Square:

|      | Estimate |
|------|----------|
| RWI  | 0.359    |
| mast | 0.638    |

Group 3 [DE2.1]:

Regressions:

|         |        | Estimate | Std.Err | z-value | P(> z ) | Std.lv | Std.all |
|---------|--------|----------|---------|---------|---------|--------|---------|
| RWI ~   |        |          |         |         |         |        |         |
| PRE     | (.p1.) | 0.319    | 0.061   | 5.212   | 0.000   | 0.319  | 0.315   |
| mast    | (.p2.) | -0.262   | 0.038   | -6.894  | 0.000   | -0.262 | -0.434  |
| RWI.lg1 | (.p3.) | 0.280    | 0.052   | 5.365   | 0.000   | 0.280  | 0.271   |
| MAX     | (.p4.) | -0.118   | 0.055   | -2.137  | 0.033   | -0.118 | -0.116  |
| mast ~  |        |          |         |         |         |        |         |
| MAX.L   | (.p5.) | 0.874    | 0.131   | 6.663   | 0.000   | 0.874  | 0.513   |
| MAX.LL  | (.p6.) | -0.921   | 0.150   | -6.136  | 0.000   | -0.921 | -0.541  |

Intercepts:

|       |        | Estimate | Std.Err | z-value | P(> z ) | Std.lv | Std.all |
|-------|--------|----------|---------|---------|---------|--------|---------|
| .RWI  | (.11.) | -0.011   | 0.051   | -0.222  | 0.825   | -0.011 | -0.011  |
| .mast |        | 0.000    |         |         |         | 0.000  | 0.000   |

Thresholds:

|         |        | Estimate | Std.Err | z-value | P(> z ) | Std.lv | Std.all |
|---------|--------|----------|---------|---------|---------|--------|---------|
| mast t1 | (.p7.) | 1.091    | 0.179   | 6.099   | 0.000   | 1.091  | 0.643   |

Variances:

|       |        | Estimate | Std.Err | z-value | P(> z ) | Std.lv | Std.all |
|-------|--------|----------|---------|---------|---------|--------|---------|
| .RWI  | (.p8.) | 0.607    | 0.055   | 10.982  | 0.000   | 0.607  | 0.580   |
| .mast |        | 1.477    |         |         |         | 1.477  | 0.514   |

Scales y\*:

|      |  | Estimate | Std.Err | z-value | P(> z ) | Std.lv | Std.all |
|------|--|----------|---------|---------|---------|--------|---------|
| mast |  | 0.823    | 0.143   | 5.759   | 0.000   | 0.823  | 1.000   |

R-Square:

|      | Estimate |
|------|----------|
| RWI  | 0.420    |
| mast | 0.486    |

## Fit parameters for multi-group model

|                     |                |                    |                 |
|---------------------|----------------|--------------------|-----------------|
| npar                | fmin           | chisq              | df              |
| 11.000              | 0.067          | 42.305             | 31.000          |
| pvalue              | baseline.chisq | baseline.df        | baseline.pvalue |
| 0.085               | 217.888        | 33.000             | 0.000           |
| cfi                 | tli            | nnfi               | rfi             |
| 0.939               | 0.935          | 0.935              | 0.793           |
| nfi                 | pnfi           | ifi                | rni             |
| 0.806               | 0.757          | 0.940              | 0.939           |
| rmsea               | rmsea.ci.lower | rmsea.ci.upper     | rmsea.pvalue    |
| 0.059               | 0.000          | 0.100              | 0.346           |
| rmr                 | rmr_nomean     | srmr               | srmr_bentler    |
| 0.054               | 0.069          | 0.095              | 0.074           |
| srmr_bentler_nomean | srmr_bollen    | srmr_bollen_nomean | srmr_mplus      |
| 0.095               | 0.040          | 0.050              | 0.074           |
| srmr_mplus_nomean   | cn_05          | cn_01              | gfi             |
| 0.095               | 335.955        | 389.610            | 0.906           |
| agfi                | pgfi           | mfi                |                 |
| 0.872               | 0.668          | 0.982              |                 |

## Appendix S14

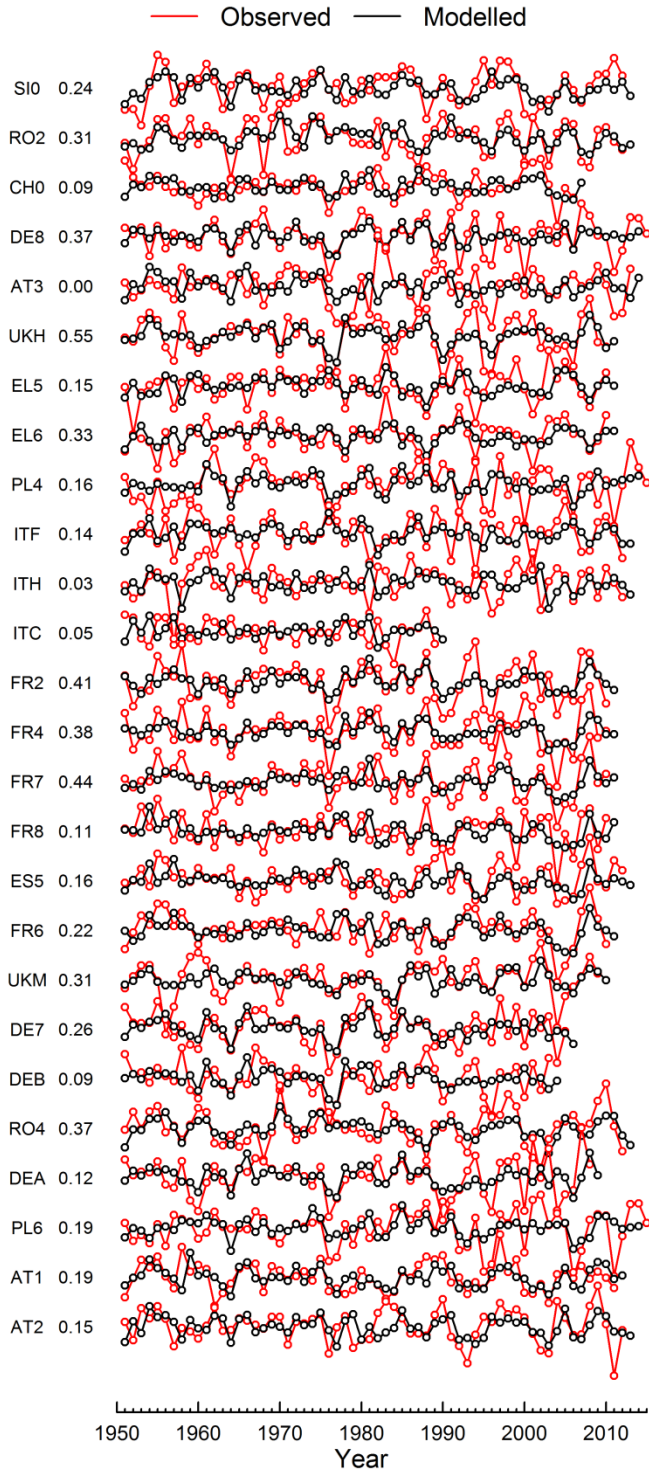

Comparison of observed and predicted RWI for independent datasets. Printed value is the  $R^2$  between observed and predicted values. Note that in these models, most years are predicted using the climate data (i.e. most data is not used in the prediction of RWI).

## Appendix S15

As data for growth (RWI) was detrended, we repeated analysis with identically detrended climate data, revealing no major changes in model structure or the values of parameters, and no change in conclusions.

### UKJ

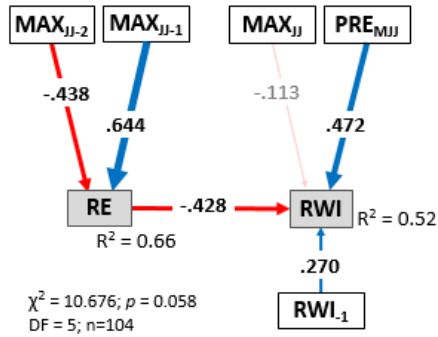

### SE2

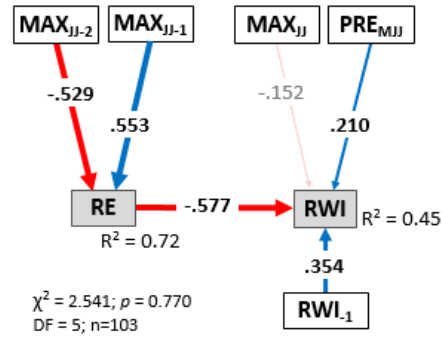

### DE1

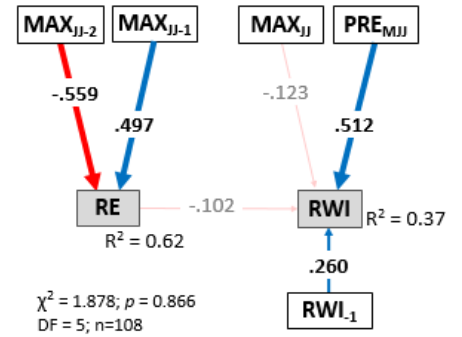

### DE2-low

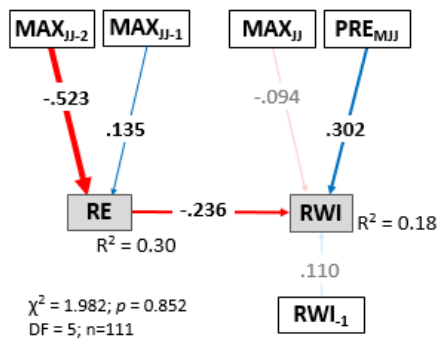

### DE2-high

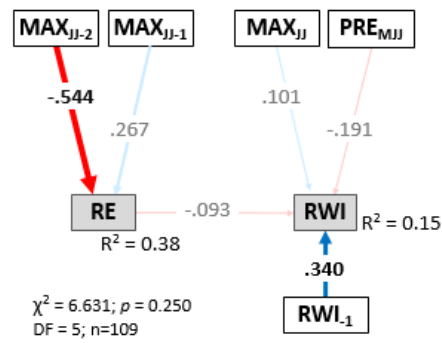

Supplement: ELE-21-1833-s001.pdf [file ELE-21-1833-s001.pdf]
